# Supplementary material for: Transgenerational dynamics of rDNA copy number in Drosophila male germline stem cells
Source: eLife. 2018 Feb 13;7:e32421. doi: 10.7554/eLife.32421 (PMC5811208; doi:10.7554/eLife.32421)
Supplement: Figure 3—source data 1. [file elife-32421-fig3-data1.xlsx]

## Sheet: P0 yw
0 days		Area	Mean	Int Den	rDNA Y/X Ratio	IGS Y/X ratio			40 days		Area	Mean	Int Den	rDNA Y/X Ratio	IGS Y/X ratio			Ybb-/X 0 days		Area	Mean	Int Den	rDNA Y/X Ratio	IGS Y/X ratio
1	Y rDNA	0.039	121.914	4.749	1.07638				1	Y rDNA	0.325	102.979	33.432	0.67315				1	Y rDNA	0.234	83.826	19.656	0.512796
	X rDNA	0.036	121.021	4.412						X rDNA	0.432	114.916	49.665						X rDNA	0.349	109.809	38.331
	Y IGS	0.038	115.271	4.378		2.55724				Y IGS	0.296	92.897	27.518		1.80304				Y IGS	0.196	62.945	12.308		0.429179
	X IGS	0.019	88.646	1.712						X IGS	0.204	74.655	15.262						X IGS	0.328	87.458	28.678
2	Y rDNA	0.032	141.292	4.569	1.50445				2	Y rDNA	0.249	92.718	23.119	0.422713				2	Y rDNA	0.249	53.966	13.433	0.39177
	X rDNA	0.025	121.173	3.037						X rDNA	0.45	121.573	54.692						X rDNA	0.452	75.925	34.288
	Y IGS	0.037	128.097	4.726		3.08284				Y IGS	0.434	87.695	38.053		1.63774				Y IGS	0.101	60.124	6.061		0.299723
	X IGS	0.017	91.714	1.533						X IGS	0.328	70.858	23.235						X IGS	0.29	69.747	20.222
3	Y rDNA	0.054	134.631	7.333	1.27842				3	Y rDNA	0.275	76.615	21.066	0.642687				3	Y rDNA	0.244	64.593	15.777	0.429084
	X rDNA	0.049	116.956	5.736						X rDNA	0.401	81.799	32.778						X rDNA	0.385	95.536	36.769
	Y IGS	0.047	161	7.494		2.16778				Y IGS	0.334	80.219	26.783		1.42448				Y IGS	0.115	59.553	6.83		0.289456
	X IGS	0.03	116.696	3.457						X IGS	0.298	63.057	18.802						X IGS	0.281	83.832	23.596
4	Y rDNA	0.041	87.997	3.581	1.36108				4	Y rDNA	0.218	81.053	17.695	0.486902				4	Y rDNA	0.063	67.244	4.268	0.409794
	X rDNA	0.029	91.509	2.631						X rDNA	0.406	89.577	36.342						X rDNA	0.116	89.457	10.415
	Y IGS	0.029	141.904	4.173		2.99784				Y IGS	0.436	62.561	27.248		1.50259				Y IGS	0.035	82.041	2.849		0.338804
	X IGS	0.013	103.444	1.392						X IGS	0.34	53.412	18.134						X IGS	0.086	98.221	8.409
5	Y rDNA	0.04	140.694	5.633	1.44066				5	Y rDNA	0.097	71.84	6.945	0.739223				5	Y rDNA	0.065	64.299	4.151	0.430691
	X rDNA	0.033	118.53	3.91						X rDNA	0.12	78.573	9.395						X rDNA	0.098	98.579	9.638
	Y IGS	0.06	133.768	7.998		2.84829				Y IGS	0.127	86.672	11.031		1.49593				Y IGS	0.036	80.552	2.928		0.36278
	X IGS	0.029	96.571	2.808						X IGS	0.098	74.931	7.374						X IGS	0.07	116.039	8.071
6	Y rDNA	0.02	141.739	2.768	2.50498				6	Y rDNA	0.258	86.733	22.398	0.657546				6	Y rDNA	0.155	77.98	12.066	0.401424
	X rDNA	0.012	90.115	1.105						X rDNA	0.366	93.097	34.063						X rDNA	0.294	102.334	30.058
	Y IGS	0.017	181.679	3.075		3.27128				Y IGS	0.242	105.145	25.453		1.44636				Y IGS	0.139	72.995	10.138		0.424415
	X IGS	0.008	122	0.94						X IGS	0.218	80.889	17.598						X IGS	0.286	83.515	23.887
7	Y rDNA	0.056	85.957	4.785	1.42751				7	Y rDNA	0.459	104.341	47.857	0.605187				7	Y rDNA	0.075	63.943	4.767	0.424488
	X rDNA	0.041	81.297	3.352						X rDNA	0.676	116.943	79.078						X rDNA	0.138	81.238	11.23
	Y IGS	0.073	132.435	9.642		3.84143				Y IGS	0.521	77.528	40.396		2.29627				Y IGS	0.058	88.275	5.115		0.403901
	X IGS	0.027	94.028	2.51						X IGS	0.305	57.718	17.592						X IGS	0.115	109.997	12.664
8	Y rDNA	0.06	93.448	5.607	1.12118				8	Y rDNA	0.332	94.873	31.46	0.593809				8	Y rDNA	0.082	48.919	4.008	0.34018
	X rDNA	0.051	97.236	5.001						X rDNA	0.479	110.693	52.98						X rDNA	0.179	65.729	11.782
	Y IGS	0.062	134.955	8.391		2.96921				Y IGS	0.381	81.714	31.113		2.13776				Y IGS	0.057	76.658	4.359		0.357412
	X IGS	0.029	96.114	2.826						X IGS	0.214	68.155	14.554						X IGS	0.138	88.36	12.196
9	Y rDNA	0.087	95.573	8.359	1.39131				9	Y rDNA	0.369	79.722	29.446	0.486542				9	Y rDNA	0.249	68.192	17.004	0.546612
	X rDNA	0.07	85.441	6.008						X rDNA	0.553	109.429	60.521						X rDNA	0.42	74.099	31.108
	Y IGS	0.099	111.34	11.018		3.65561				Y IGS	0.441	75.098	33.141		1.78168				Y IGS	0.218	62.952	13.709		0.453595
	X IGS	0.04	75.888	3.014						X IGS	0.282	65.882	18.601						X IGS	0.407	74.336	30.223
10	Y rDNA	0.032	113.949	3.647	1.17079				10	Y rDNA	0.204	75.431	15.371	0.453315				10	Y rDNA	0.252	68.767	17.348	0.440864
	X rDNA	0.027	116.691	3.115						X rDNA	0.333	101.758	33.908						X rDNA	0.392	100.346	39.35
	Y IGS	0.035	146.489	5.134		2.48379				Y IGS	0.688	50.74	34.928		1.20599				Y IGS	0.118	65.484	7.759		0.302637
	X IGS	0.017	122.128	2.067						X IGS	0.485	59.685	28.962						X IGS	0.269	95.388	25.638
11	Y rDNA	0.032	113.949	3.647	1.51516				11	Y rDNA	0.088	72.616	6.367	0.54484				11	Y rDNA	0.231	74.081	17.081	0.43366
	X rDNA	0.023	103.167	2.407						X rDNA	0.133	88.131	11.686						X rDNA	0.446	88.299	39.388
	Y IGS	0.035	146.489	5.134		3.46892				Y IGS	0.098	97.519	9.597		1.57405				Y IGS	0.185	64.256	11.895		0.468658
	X IGS	0.015	101.769	1.48						X IGS	0.073	83.49	6.097						X IGS	0.358	70.926	25.381
12	Y rDNA	0.027	129.928	3.51	1.18301				12	Y rDNA	0.087	80.693	6.987	0.794971				12	Y rDNA	0.447	57.451	25.708	0.370006
	X rDNA	0.025	120.973	2.967						X rDNA	0.102	86.172	8.789						X rDNA	0.782	88.799	69.48
	Y IGS	0.046	126.249	5.836		2.70185				Y IGS	0.097	103.897	10.067		2.07268				Y IGS	0.428	42.95	18.38		0.386964
	X IGS	0.024	88.862	2.16						X IGS	0.061	79.358	4.857						X IGS	0.781	60.84	47.498
13	Y rDNA	0.033	130.28	4.34	1.35752				13	Y rDNA	0.083	85.617	7.116	0.580993				13	Y rDNA	0.239	100.022	23.953	0.635375
	X rDNA	0.032	100.211	3.197						X rDNA	0.119	102.708	12.248						X rDNA	0.405	93.146	37.699
	Y IGS	0.026	174.074	4.609		4.34811				Y IGS	0.09	99.971	8.982		1.60307				Y IGS	0.171	72.723	12.46		0.455343
	X IGS	0.011	98.687	1.06						X IGS	0.068	82.1	5.603						X IGS	0.39	70.209	27.364
14	Y rDNA	0.046	117.513	5.419	1.28504				14	Y rDNA	0.19	87.824	16.677	0.632399				14	Y rDNA	0.232	55.802	12.939	0.478726
	X rDNA	0.04	105.027	4.217						X rDNA	0.275	95.986	26.371						X rDNA	0.465	58.104	27.028
	Y IGS	0.047	133.177	6.214		2.62416				Y IGS	0.257	82.252	21.125		1.59844				Y IGS	0.138	61.281	8.431		0.410028
	X IGS	0.024	99.658	2.368						X IGS	0.206	64.242	13.216						X IGS	0.328	62.644	20.562
15	Y rDNA	0.03	108.989	3.229	1.2501				15	Y rDNA	0.252	86.072	21.668	0.519429				15	Y rDNA	0.248	66.604	16.528	0.506217
	X rDNA	0.022	115.549	2.583						X rDNA	0.351	118.767	41.715						X rDNA	0.444	73.462	32.65
	Y IGS	0.027	139.98	3.752		2.31319				Y IGS	0.359	75.808	27.227		1.38398				Y IGS	0.218	56.238	12.247		0.512084
	X IGS	0.016	101.68	1.622						X IGS	0.321	61.355	19.673						X IGS	0.359	66.669	23.916
16	Y rDNA	0.027	124.565	3.325	1.28726				16	Y rDNA	0.206	94.97	19.61	0.847377				16	Y rDNA	0.183	90.811	16.603	0.601449
	X rDNA	0.022	115.549	2.583						X rDNA	0.237	97.611	23.142						X rDNA	0.317	87.215	27.605
	Y IGS	0.031	130.532	4.022		2.47965				Y IGS	0.388	64.678	25.103		1.59303				Y IGS	0.157	62.315	9.771		0.450567
	X IGS	0.016	101.68	1.622						X IGS	0.318	49.565	15.758						X IGS	0.334	64.909	21.686
17	Y rDNA	0.021	149.714	3.119	1.43534				17	Y rDNA	0.475	79.455	37.736	0.595891				17	Y rDNA	0.243	105.075	25.562	0.555056
	X rDNA	0.016	137.164	2.173						X rDNA	0.691	91.62	63.327						X rDNA	0.479	96.11	46.053
	Y IGS	0.031	158.422	4.933		2.79807				Y IGS	0.394	73.171	28.829		2.00787				Y IGS	0.166	76.691	12.757		0.466435
	X IGS	0.016	109.777	1.763						X IGS	0.233	61.718	14.358						X IGS	0.383	71.485	27.35
18	Y rDNA	0.018	113.547	2.095	0.993833				18	Y rDNA	0.231	87.785	20.26	0.469699				18	Y rDNA	0.098	112.848	11.02	0.313978
	X rDNA	0.018	118.476	2.108						X rDNA	0.452	95.443	43.134						X rDNA	0.253	138.827	35.098
	Y IGS	0.017	121.338	2.107		2.38348				Y IGS	0.204	103.456	21.059		1.05395				Y IGS	0.17	89.485	15.244		0.454042
	X IGS	0.01	90.522	0.884						X IGS	0.252	79.134	19.981						X IGS	0.323	103.796	33.574
19	Y rDNA	0.018	113.547	2.095	0.988208				19	Y rDNA	0.291	55.533	16.179	0.613375				19	Y rDNA	0.17	96.316	16.377	0.45158
	X rDNA	0.02	106.19	2.12						X rDNA	0.358	73.686	26.377						X rDNA	0.324	111.895	36.266
	Y IGS	0.017	121.338	2.107		2.31031				Y IGS	0.258	63.531	16.42		1.22849				Y IGS	0.153	92.447	14.184		0.394976
	X IGS	0.011	86.608	0.912						X IGS	0.21	63.627	13.366						X IGS	0.305	117.653	35.911
20	Y rDNA	0.254	64.668	16.42	1.2414				20	Y rDNA	0.183	93.736	17.108	0.576318				20	Y rDNA	0.165	145.008	23.979	0.460294
	X rDNA	0.191	69.22	13.227						X rDNA	0.249	119.104	29.685						X rDNA	0.332	156.694	52.095
	Y IGS	0.305	129.836	39.588		2.83989				Y IGS	0.348	73.756	25.658		1.27014				Y IGS	0.117	104.119	12.213		0.374024
	X IGS	0.134	104.113	13.94						X IGS	0.301	67.064	20.201						X IGS	0.265	123.079	32.653
21	Y rDNA	0.49	114.834	56.233	1.13225				21	Y rDNA	0.425	100.929	42.853	0.583781				21	Y rDNA	0.124	129.563	16.097	0.500809
	X rDNA	0.413	120.386	49.665						X rDNA	0.535	137.334	73.406						X rDNA	0.245	130.955	32.142
	Y IGS	0.362	122.797	44.477		2.88999				Y IGS	0.397	90.643	36.017		1.52744				Y IGS	0.099	114.992	11.404		0.415992
	X IGS	0.164	93.804	15.39						X IGS	0.28	84.296	23.58						X IGS	0.22	124.885	27.414
22	Y rDNA	0.119	73.976	8.838	0.944534				22	Y rDNA	0.396	90.224	35.723	0.756667				22	Y rDNA	0.017	102.89	1.73	0.454068
	X rDNA	0.092	101.57	9.357						X rDNA	0.484	97.555	47.211						X rDNA	0.03	126.776	3.81
	Y IGS	0.1	119.252	11.905		2.26417				Y IGS	0.28	104.878	29.338		1.58088				Y IGS	0.013	169.677	2.283		0.500987
	X IGS	0.049	108.174	5.258						X IGS	0.229	80.98	18.558						X IGS	0.024	186.662	4.557
23	Y rDNA	0.029	107.148	3.139	1.85301				23	Y rDNA	0.257	58.311	14.976	0.436059				23	Y rDNA	0.018	94.84	1.677	0.469091
	X rDNA	0.02	86.265	1.694						X rDNA	0.404	84.924	34.344						X rDNA	0.03	120.685	3.575
	Y IGS	0.039	133.324	5.266		1.61881				Y IGS	0.379	84.558	32.058		1.45612				Y IGS	0.021	142.067	2.991		0.495117
	X IGS	0.028	117.113	3.253						X IGS	0.334	65.942	22.016						X IGS	0.035	171.836	6.041
24	Y rDNA	0.085	160.042	13.667	1.57945				24	Y rDNA	0.242	76.574	18.562	0.450621				24	Y rDNA	0.014	86.773	1.243	0.496406
	X rDNA	0.061	142.409	8.653						X rDNA	0.406	101.422	41.192						X rDNA	0.026	96.569	2.504
	Y IGS	0.092	157.171	14.462		2.14188				Y IGS	0.321	85.604	27.476		1.24551				Y IGS	0.023	129.559	2.994		0.63838
	X IGS	0.053	127.252	6.752						X IGS	0.275	80.262	22.06						X IGS	0.033	142.171	4.69
25	Y rDNA	0.265	102.536	27.147	2.13689				25	Y rDNA	0.437	97.574	42.657	0.56438
	X rDNA	0.109	116.965	12.704						X rDNA	0.635	119.07	75.582
	Y IGS	0.317	134.074	42.553		3.7926				Y IGS	0.542	76.298	41.328		1.75193
	X IGS	0.097	115.669	11.22						X IGS	0.42	56.176	23.59
26	Y rDNA	1.307	206.982	270.58	1.24145				26	Y rDNA	0.474	109.651	51.994	0.546621
	X rDNA	0.941	231.546	217.954						X rDNA	0.732	129.87	95.119
	Y IGS	1.099	224.609	246.92		2.71132				Y IGS	0.48	89.288	42.881		1.729
	X IGS	0.509	178.89	91.07						X IGS	0.372	66.715	24.801
27	Y rDNA	1.431	184.553	264.084	1.19356				27	Y rDNA	0.153	123.257	18.818	0.61032
	X rDNA	0.939	235.605	221.257						X rDNA	0.221	139.361	30.833
	Y IGS	1.192	247.846	295.346		2.86922				Y IGS	0.29	69.037	20.031		1.92144
	X IGS	0.517	199.19	102.936						X IGS	0.216	48.183	10.425
28	Y rDNA	0.86	276.001	237.443	1.45988				28	Y rDNA	0.155	102.484	15.846	0.723529
	X rDNA	0.561	289.857	162.646						X rDNA	0.181	121.005	21.901
	Y IGS	0.743	317.203	235.717		2.80736				Y IGS	0.252	55.877	14.103		1.54536
	X IGS	0.303	276.826	83.964						X IGS	0.196	46.495	9.126
29	Y rDNA	0.612	233.533	142.968	0.962326				29	Y rDNA	0.503	91.099	45.787	0.602794
	X rDNA	0.534	278.403	148.565						X rDNA	0.742	102.374	75.958
	Y IGS	0.539	256.283	138.247		3.09077				Y IGS	0.739	67.236	49.683		1.92242
	X IGS	0.227	196.813	44.729						X IGS	0.549	47.052	25.844
30	Y rDNA	0.665	274.993	182.931	1.62665				30	Y rDNA	0.62	88.712	55.031	0.686463
	X rDNA	0.56	200.926	112.459						X rDNA	0.789	101.624	80.166
	Y IGS	0.743	321.056	238.612		2.86435				Y IGS	0.646	71.529	46.219		1.72601
	X IGS	0.427	195.247	83.304						X IGS	0.477	56.152	26.778
31	Y rDNA	1.421	138.292	196.498	1.32992				31	Y rDNA	0.239	76.67	18.311	0.68101
	X rDNA	1.206	122.472	147.752						X rDNA	0.29	92.671	26.888
	Y IGS	1.126	161.173	181.478		2.28441				Y IGS	0.498	41.66	20.753		1.33546
	X IGS	0.59	134.693	79.442						X IGS	0.411	37.809	15.54
32	Y rDNA	0.908	204.971	186.105	1.42303				32	Y rDNA	0.104	124.516	12.984	0.578635
	X rDNA	0.629	207.784	130.781						X rDNA	0.17	132.142	22.439
	Y IGS	0.977	289.227	282.579		2.9394				Y IGS	0.187	78.323	14.635		2.81226
	X IGS	0.491	195.864	96.135						X IGS	0.084	62.291	5.204
33	Y rDNA	1.144	166.294	190.28	1.14374				33	Y rDNA	0.204	126.972	25.943	1.25159
	X rDNA	1.057	157.372	166.366						X rDNA	0.173	119.617	20.728
	Y IGS	1.086	210.736	228.756		2.98762				Y IGS	0.183	84.755	15.487		2.37421
	X IGS	0.564	135.672	76.568						X IGS	0.105	62.165	6.523
34	Y rDNA	1.485	157.869	234.513	1.22623				34	Y rDNA	0.416	106.432	44.243	0.969009
	X rDNA	1.288	148.468	191.247						X rDNA	0.36	126.779	45.658
	Y IGS	1.145	182.048	208.527		2.43433				Y IGS	0.473	63.992	30.274		3.53875
	X IGS	0.601	142.437	85.661						X IGS	0.164	52.247	8.555
35	Y rDNA	1.062	176.351	187.255	1.11671				35	Y rDNA	0.213	163.314	34.733	1.53965
	X rDNA	1.25	134.109	167.685						X rDNA	0.152	148.822	22.559
	Y IGS	0.964	240.288	231.713		3.51032				Y IGS	0.163	110.214	17.95		2.76324
	X IGS	0.466	141.679	66.009						X IGS	0.094	69.287	6.496
36	Y rDNA	1.093	223.174	243.851	1.29615				36	Y rDNA	0.149	135.457	20.239	0.875654
	X rDNA	1.043	180.419	188.135						X rDNA	0.185	124.786	23.113
	Y IGS	0.823	302.598	249.037		4.31936				Y IGS	0.165	116.591	19.267		2.73213
	X IGS	0.32	180.439	57.656						X IGS	0.08	87.945	7.052
									37	Y rDNA	0.211	112.848	23.828	1.14541
										X rDNA	0.167	124.816	20.803
										Y IGS	0.205	114.434	23.406		2.70152
										X IGS	0.094	91.888	8.664
									38	Y rDNA	0.222	110.614	24.593	1.09045
										X rDNA	0.21	107.526	22.553
										Y IGS	0.19	117.04	22.262		2.6867
										X IGS	0.104	79.796	8.286
									39	Y rDNA	0.345	101.697	35.135	1.13065
										X rDNA	0.27	115.106	31.075
										Y IGS	0.254	97.678	24.769		2.96103
										X IGS	0.113	73.706	8.365
