# Supplementary material for: Transgenerational dynamics of rDNA copy number in Drosophila male germline stem cells
Source: eLife. 2018 Feb 13;7:e32421. doi: 10.7554/eLife.32421 (PMC5811208; doi:10.7554/eLife.32421)
Supplement: Figure 4—source data 1. [file elife-32421-fig4-data1.xlsx]

## Sheet: P0 yw
0 days old		18S									IGS
		X Area	X Average	X Total	Y Area	Y Average	Y Total	Y/X ratio				X Area	X Average	X Total	Y Area	Y Average	Y Total	Y/X ratio
	1	0.145	95.9539	13.9133	0.146	81.784	11.9405	0.858204				0.083	72.6117	6.02677	0.106	86.782	9.19889	1.52634
	2	0.024	83.475	2.0034	0.023	63.983	1.47161	0.734556				0.014	98.914	1.3848	0.021	95.991	2.01581	1.45567
	3	0.084	98.671	8.28836	0.061	89.136	5.4373	0.656016				0.022	82.9269	1.82439	0.035	107.056	3.74696	2.05381
	4	0.145	78.321	11.3565	0.1	74.942	7.4942	0.659901				0.043	51.0512	2.1952	0.058	72.252	4.19062	1.90899
	5	0.209	83.813	17.5169	0.15	92.897	13.9345	0.795491				0.057	63.7116	3.63156	0.097	95.126	9.22722	2.54084
	6	0.13	77.467	10.0707	0.101	67.319	6.79922	0.675148				0.07	88.912	6.22384	0.095	95.107	9.03516	1.4517
	7	0.075	95.187	7.13902	0.056	101.676	5.69386	0.797568				0.022	72.693	1.59925	0.033	105.266	3.47378	2.17213
	8	0.218	88.577	19.3098	0.153	80.151	12.2631	0.635072				0.126	88.282	11.1235	0.148	106.763	15.8009	1.4205
	9	0.093	71.318	6.63257	0.062	84.944	5.26653	0.79404				0.059	58.328	3.44135	0.058	92.169	5.3458	1.5534
	10	0.075	97.345	7.30087	0.054	82.652	4.46321	0.611325				0.041	97.1106	3.98153	0.052	105.078	5.46406	1.37235
	11	0.072	89.6275	6.45318	0.049	86.783	4.25237	0.658957				0.018	97.4889	1.7548	0.03	130.506	3.91518	2.23113
	12	0.048	112.9	5.4192	0.038	85.795	3.26021	0.601604				0.034	110.034	3.74116	0.043	118.973	5.11584	1.36745
	13	0.065	105.611	6.86472	0.039	105.382	4.10991	0.598701				0.014	77.958	1.09141	0.03	110.281	3.30844	3.03134
	14	0.032	98.3244	3.14638	0.026	76.667	1.99334	0.633535				0.013	97.0158	1.26121	0.018	109.349	1.96828	1.56063
	15	0.055	79.1039	4.35072	0.043	53.9207	2.31859	0.532922				0.025	98.2573	2.45643	0.03	93.1751	2.79525	1.13793
	16	0.033	85.0801	2.80764	0.023	103.951	2.39088	0.85156				0.012	49.5383	0.59446	0.024	83.2792	1.9987	3.36221
	17	0.075	86.241	6.46807	0.059	96.62	5.70058	0.881341				0.019	70.837	1.3459	0.03	104.236	3.12708	2.32341
	18	0.041	95.4673	3.91416	0.049	72.134	3.53457	0.90302				0.03	51.8177	1.55453	0.056	64.819	3.62986	2.33502
	19	0.075	96.49	7.23675	0.116	67.495	7.82942	1.0819				0.026	85.415	2.22079	0.061	92.0143	5.61287	2.52742
	20	0.066	62.6865	4.13731	0.063	83.42	5.25546	1.27026				0.023	47.7496	1.09824	0.055	83.045	4.56747	4.1589
	21	0.03	68.7555	2.06266	0.029	84.7923	2.45898	1.19214				0.017	43.2547	0.73533	0.029	73.4392	2.12974	2.8963
																			Variance							#DIV/0!	#DIV/0!	#DIV/0!							#DIV/0!
																			p value to 1 day old							0.1229									6.764e-07

## Sheet: F1 yw
0 days old		18S									IGS
		X Area	X Average	X Total	Y Area	Y Average	Y Total	Y/X ratio				X Area	X Average	X Total	Y Area	Y Average	Y Total	Y/X ratio
	1	0.083	85.9582	7.13453	0.033	60.609	2.0001	0.28034				0.068	81.4783	5.54052	0.066	95.391	6.29581	1.13632
	2	0.075	89.1348	6.68511	0.051	71.777	3.66063	0.547579				0.041	51.5781	2.1147	0.045	71.8885	3.23498	1.52976
	3	0.047	99.28	4.66616	0.037	87.71	3.24527	0.695491				0.026	45.434	1.18128	0.031	64.325	1.99408	1.68806
	4	0.022	94.806	2.08573	0.015	86.8707	1.30306	0.62475				0.013	87.1704	1.13321	0.012	123.069	1.47683	1.30322
	5	0.028	92.5775	2.59217	0.019	87.7307	1.66688	0.643045				0.016	62.034	0.992544	0.018	82.9343	1.49282	1.50403
	6	0.022	103.684	2.28106	0.016	86.0815	1.3773	0.6038				0.013	74.1376	0.963789	0.013	83.5829	1.08658	1.1274
	7	0.026	89.1015	2.31664	0.018	72.627	1.30729	0.564303				0.023	84.5516	1.94469	0.027	98.1264	2.64941	1.36239
	8	0.037	109.231	4.04156	0.027	95.9337	2.59021	0.640894				0.026	73.5596	1.91255	0.03	91.071	2.73213	1.42853
	9	0.046	90.3935	4.1581	0.038	79.7028	3.02871	0.728387				0.04	76.7659	3.07064	0.047	93.3521	4.38755	1.42887
	10	0.072	97.2843	7.00447	0.052	94.1155	4.89401	0.698698				0.04	54.0057	2.16023	0.044	78.53	3.45532	1.59952
	11	0.165	91.251	15.0564	0.101	90.521	9.14262	0.607224				0.071	64.3225	4.5669	0.091	102.848	9.35917	2.04935
	12	0.067	110.087	7.37584	0.051	89.041	4.54109	0.615671				0.042	82.489	3.46454	0.047	101.537	4.77224	1.37745
	13	0.065	88.3252	5.74114	0.045	84.262	3.79179	0.66046				0.049	71.6369	3.51021	0.051	103.466	5.27677	1.50326
	14	0.113	95.5392	10.7959	0.083	89.937	7.46477	0.691443				0.079	77.9208	6.15574	0.088	111.974	9.85371	1.60074
	15	0.057	110.811	6.31623	0.051	91.4764	4.6653	0.738621				0.032	64.898	2.07674	0.041	78.504	3.21866	1.54987
	16	0.054	104.1	5.6214	0.039	99.119	3.86564	0.687665				0.038	67.271	2.5563	0.037	97.497	3.60739	1.41118
	17	0.063	112.319	7.0761	0.043	76.071	3.27105	0.462268				0.054	90.406	4.88192	0.056	105.649	5.91634	1.21189
	18	0.089	109.992	9.78932	0.045	84.2739	3.79232	0.387394				0.045	66.0894	2.97402	0.042	81.8335	3.43701	1.15568
	19	0.067	94.5415	6.33428	0.046	87.9016	4.04347	0.638348				0.038	71.1848	2.70502	0.042	97.381	4.09	1.512
	20	0.061	104.553	6.37771	0.034	101.335	3.44539	0.540224				0.059	84.0332	4.95796	0.053	109.288	5.79224	1.16827
	21	0.101	100.391	10.1395	0.068	83.6678	5.68941	0.561114				0.05	63.0944	3.15472	0.056	85.5224	4.78925	1.51812
	22	0.088	95.8504	8.43483	0.081	79.8112	6.4647	0.766429				0.041	66.6256	2.73165	0.075	88.9551	6.67163	2.44235
	23	0.07	105.028	7.35196	0.058	79.1678	4.59173	0.624559				0.047	67.1598	3.15651	0.046	84.4176	3.88321	1.23022
	24	0.037	107.385	3.97325	0.024	86.2575	2.07018	0.521029				0.041	96.9635	3.9755	0.038	113.368	4.308	1.08364
	25	0.12	95.0879	11.4105	0.09	81.2887	7.31598	0.64116				0.06	73.8037	4.42822	0.066	84.9517	5.60681	1.26615
