# Supplementary material for: Transgenerational dynamics of rDNA copy number in Drosophila male germline stem cells
Source: eLife. 2018 Feb 13;7:e32421. doi: 10.7554/eLife.32421 (PMC5811208; doi:10.7554/eLife.32421)
Supplement: Figure 5—source data 1. [file elife-32421-fig5-data1.xlsx]

## Sheet: F1 yw
3-5 days		Area	Mean	Int Den	rDNA Y/X Ratio	IGS Y/X ratio			11-13 days			Area	Mean	Int Den	rDNA Y/X Ratio	IGS Y/X ratio
1	Y rDNA	0.469	590.096	276.627	0.944984				1	Y rDNA	1	0.995	136.965	136.212	1.26673
	X rDNA	0.509	575.526	292.732						X rDNA	2	0.77	139.634	107.53
	Y IGS	1.619	178.847	289.596		3.83033				Y IGS	3	0.806	160.106	129.071		3.37062
	X IGS	0.69	109.564	75.606						X IGS	4	0.338	113.18	38.293
2	Y rDNA	0.776	257.135	199.437	1.1071				2	Y rDNA	5	0.921	236.538	217.894	1.19446
	X rDNA	0.702	256.535	180.143						X rDNA	6	0.605	301.619	182.421
	Y IGS	0.645	267.128	172.317		3.5508				Y IGS	7	0.815	195.022	158.961		2.50431
	X IGS	0.296	164.022	48.529						X IGS	8	0.34	186.812	63.475
3	Y rDNA	1.075	208.054	223.653	1.15917				3	Y rDNA	9	0.328	162.497	53.225	0.588304
	X rDNA	0.859	224.563	192.943						X rDNA	10	0.419	216.079	90.472
	Y IGS	0.918	215.597	197.859		2.85766				Y IGS	11	0.684	163.824	112.111		1.87599
	X IGS	0.465	148.976	69.238						X IGS	12	0.367	162.837	59.761
4	Y rDNA	1.392	187.397	260.886	1.21686				4	Y rDNA	13	1.48	185.517	274.61	1.15681
	X rDNA	0.912	235.103	214.393						X rDNA	14	1.549	153.249	237.386
	Y IGS	1.931	108.707	209.949		1.96878				Y IGS	15	1.37	199.063	272.636		2.59849
	X IGS	1.021	104.441	106.639						X IGS	16	0.84	124.861	104.921
5	Y rDNA	1.12	207.098	232.013	1.07242				5	Y rDNA	17	2.088	161.237	336.606	0.994555
	X rDNA	0.777	278.415	216.345						X rDNA	18	2.143	157.953	338.449
	Y IGS	0.83	194.585	161.532		2.15848				Y IGS	19	1.507	208.003	313.442		2.44089
	X IGS	0.419	178.685	74.836						X IGS	20	0.771	166.558	128.413
6	Y rDNA	1.215	199.337	242.177	1.08521				6	Y rDNA	21	1.94	158.345	307.242	1.75194
	X rDNA	0.857	260.5	223.162						X rDNA	22	1.552	113.017	175.372
	Y IGS	1.061	117.442	124.592		2.07986				Y IGS	23	1.997	169.723	338.937		3.61298
	X IGS	0.584	102.508	59.904						X IGS	24	0.923	101.643	93.811
7	Y rDNA	0.849	226.07	191.942	1.16961				7	Y rDNA	25	1.879	204.132	383.467	1.54236
	X rDNA	0.779	210.759	164.107						X rDNA	26	1.641	151.529	248.624
	Y IGS	1.007	182.941	184.255		3.30171				Y IGS	27	2.226	161.836	360.248		3.47673
	X IGS	0.474	117.855	55.806						X IGS	28	1.082	95.795	103.617
8	Y rDNA	0.644	170.173	109.547	1.04962				8	Y rDNA	29	0.899	303.47	272.925	5.29838
	X rDNA	0.536	194.672	104.368						X rDNA	30	0.26	198.264	51.511
	Y IGS	0.423	263.426	111.333		2.57757				Y IGS	31	1.308	239.662	313.387		6.87448
	X IGS	0.202	214.32	43.193						X IGS	32	0.371	122.823	45.587
9	Y rDNA	0.761	162.587	123.705	1.15345				9	Y rDNA	33	1.749	259.383	453.548	1.18575
	X rDNA	0.738	145.285	107.248						X rDNA	34	1.728	221.376	382.499
	Y IGS	0.531	201.628	107.06		3.0237				Y IGS	35	1.762	255.035	449.47		3.30306
	X IGS	0.249	142.026	35.407						X IGS	36	0.719	189.317	136.077
10	Y rDNA	0.765	150.479	115.061	0.92414				10	Y rDNA	37	1.424	198.428	282.632	1.13445
	X rDNA	0.638	195.066	124.506						X rDNA	38	1.173	212.355	249.136
	Y IGS	1.533	150.364	230.434		2.14023				Y IGS	39	1.439	204.768	294.601		2.36369
	X IGS	0.755	142.622	107.668						X IGS	40	0.818	152.364	124.636
11	Y rDNA	1.023	301.768	308.682	1.30567				11	Y rDNA	41	0.711	229.512	163.249	1.24557
	X rDNA	0.841	281.103	236.416						X rDNA	42	0.557	235.382	131.064
	Y IGS	1.251	288.412	360.69		2.79971				Y IGS	43	0.657	199.774	131.273		3.6601
	X IGS	0.628	205.245	128.831						X IGS	44	0.267	134.535	35.866
12	Y rDNA	0.388	397.73	154.198	0.805573				12	Y rDNA	45	0.549	236.92	130.039	1.03967
	X rDNA	0.481	397.645	191.414						X rDNA	46	0.527	237.273	125.077
	Y IGS	0.589	317.535	186.94		0.807551				Y IGS	47	0.568	196.591	111.566		3.45609
	X IGS	0.706	327.737	231.49						X IGS	48	0.243	132.798	32.281
13	Y rDNA	1.079	178.207	192.334	1.09949				13	Y rDNA	49	0.738	241.817	178.469	1.37507
	X rDNA	0.82	213.368	174.93						X rDNA	50	0.524	247.922	129.789
	Y IGS	1.074	229.672	246.686		2.48816				Y IGS	51	0.706	222.515	157.032		2.66007
	X IGS	0.517	191.724	99.144						X IGS	52	0.346	170.463	59.033
14	Y rDNA	0.594	338.224	200.865	1.32962				14	Y rDNA	53	0.921	251.232	231.346	1.09334
	X rDNA	0.418	361.787	151.069						X rDNA	54	0.812	260.665	211.595
	Y IGS	0.603	259.34	156.41		2.5646				Y IGS	55	0.988	238.623	235.723		2.56659
	X IGS	0.314	194.212	60.988						X IGS	56	0.558	164.491	91.843
15	Y rDNA	0.577	224.19	129.432	1.25148				15	Y rDNA	57	0.534	229.196	122.346	1.09265
	X rDNA	0.47	220.175	103.423						X rDNA	58	0.409	273.605	111.972
	Y IGS	0.585	168.477	98.5		3.23513				Y IGS	59	0.544	264.204	143.834		2.90234
	X IGS	0.244	124.545	30.447						X IGS	60	0.23	215.304	49.558
16	Y rDNA	1.086	270.504	293.639	1.19303				16	Y rDNA	61	1.005	209.037	210.132	1.25942
	X rDNA	1.086	226.736	246.128						X rDNA	62	0.863	193.378	166.848
	Y IGS	1.509	218.778	330.118		4.64549				Y IGS	63	0.911	207.331	188.861		2.46745
	X IGS	0.442	160.597	71.062						X IGS	64	0.539	142.083	76.541
17	Y rDNA	0.74	258.372	191.083	1.15576				17	Y rDNA	65	0.671	246.228	165.22	1.3155
	X rDNA	0.833	198.48	165.331						X rDNA	66	0.576	218.029	125.595
	Y IGS	0.753	245.79	184.967		2.37092				Y IGS	67	0.874	211.663	184.902		2.47453
	X IGS	0.548	142.483	78.015						X IGS	68	0.592	126.246	74.722
18	Y rDNA	0.96	292.191	280.468	1.41943				18	Y rDNA	69	0.534	219.948	117.547	1.03834
	X rDNA	0.895	220.694	197.592						X rDNA	70	0.454	249.179	113.207
	Y IGS	0.576	349.69	201.396		3.89902				Y IGS	71	0.551	272.706	150.361		2.86555
	X IGS	0.275	187.679	51.653						X IGS	72	0.24	218.331	52.472
19	Y rDNA	0.723	242.818	175.576	1.08351				19	Y rDNA	73	0.64	327.459	209.449	1.60547
	X rDNA	0.88	184.084	162.044						X rDNA	74	0.417	312.779	130.46
	Y IGS	0.94	263.298	247.575		3.95727				Y IGS	75	0.769	261.248	200.845		3.94696
	X IGS	0.377	165.833	62.562						X IGS	76	0.272	186.979	50.886
20	Y rDNA	0.817	256.304	209.283	1.02457				20	Y rDNA	77	1.821	262.499	478.066	1.26366
	X rDNA	1.041	196.148	204.265						X rDNA	78	1.685	224.496	378.32
	Y IGS	0.564	323.587	182.53		6.88065				Y IGS	79	1.718	274.026	470.815		3.73781
	X IGS	0.146	181.757	26.528						X IGS	80	0.685	183.791	125.96
21	Y rDNA	0.751	243.12	182.58	1.26714				21	Y rDNA	81	0.777	176.698	137.259	1.20926
	X rDNA	0.666	216.319	144.088						X rDNA	82	0.506	224.483	113.507
	Y IGS	1.62	211.503	342.619		4.1965				Y IGS	83	0.873	133.217	116.339		2.39825
	X IGS	0.583	140.065	81.644						X IGS	84	0.387	125.412	48.51
22	Y rDNA	0.934	261.188	243.975	1.37398				22	Y rDNA	1	1.4	249.448	349.327	1.13535
	X rDNA	0.848	209.428	177.568						X rDNA	2	1.414	217.593	307.683
	Y IGS	1.261	318.447	401.571		5.40916				Y IGS	3	1.21	355.639	430.179		3.0528
	X IGS	0.316	234.818	74.239						X IGS	4	0.586	240.442	140.913
23	Y rDNA	0.945	276.486	261.213	1.23906				23	Y rDNA	5	1.149	192.237	220.832	1.12844
	X rDNA	0.921	228.948	210.816						X rDNA	6	1.116	175.352	195.697
	Y IGS	0.863	260.754	224.929		3.29421				Y IGS	7	1.152	264.896	305.261		2.21768
	X IGS	0.356	191.798	68.28						X IGS	8	0.713	193.189	137.649
24	Y rDNA	0.797	315.161	251.214	1.25356				24	Y rDNA	9	0.675	226.341	152.69	1.8962
	X rDNA	0.822	243.84	200.4						X rDNA	10	0.434	185.565	80.524
	Y IGS	1.082	283.501	306.684		2.73415				Y IGS	11	0.881	210.684	185.691		4.81239
	X IGS	0.545	205.964	112.168						X IGS	12	0.288	133.96	38.586
25	Y rDNA	0.788	262.824	207.084	1.25184				25	Y rDNA	13	0.603	169.678	102.348	0.952917
	X rDNA	0.532	310.981	165.424						X rDNA	14	0.463	231.899	107.405
	Y IGS	0.717	255.881	183.464		2.31696				Y IGS	15	0.729	192.412	140.175		2.22684
	X IGS	0.367	215.819	79.183						X IGS	16	0.392	160.589	62.948
26	Y rDNA	0.596	234.786	139.984	1.07793				26	Y rDNA	17	0.803	159.29	127.845	0.908229
	X rDNA	0.496	261.688	129.864						X rDNA	18	0.63	223.282	140.763
	Y IGS	0.853	276.099	235.457		5.17602				Y IGS	19	1.002	151.031	151.319		2.54763
	X IGS	0.199	228.891	45.49						X IGS	20	0.474	125.398	59.396
27	Y rDNA	0.725	343.202	248.791	1.31032				27	Y rDNA	21	1.608	143.868	231.409	0.998524
	X rDNA	0.627	302.949	189.871						X rDNA	22	1.269	182.66	231.751
	Y IGS	0.775	305.162	236.488		3.09722				Y IGS	23	2.158	161.893	349.427		2.54206
	X IGS	0.398	191.814	76.355						X IGS	24	1.05	130.916	137.458
28	Y rDNA	0.607	283.016	171.653	1.11964				28	Y rDNA	25	0.66	269.739	178.062	1.17222
	X rDNA	0.515	297.803	153.311						X rDNA	26	0.513	295.823	151.901
	Y IGS	0.65	207.517	134.846		2.22192				Y IGS	27	0.682	247.879	168.947		3.12807
	X IGS	0.368	164.914	60.689						X IGS	28	0.27	199.974	54.01
29	Y rDNA	0.62	237.035	146.939	1.28247				29	Y rDNA	29	0.948	295.105	279.795	1.22113
	X rDNA	0.574	199.677	114.575						X rDNA	30	0.76	301.293	229.128
	Y IGS	0.567	234.218	132.852		3.64938				Y IGS	31	0.993	224.205	222.534		3.10975
	X IGS	0.211	172.734	36.404						X IGS	32	0.463	154.549	71.56
30	Y rDNA	0.423	163.409	69.09	0.453201				30	Y rDNA	33	0.747	240.207	179.475	1.17132
	X rDNA	0.794	192.112	152.449						X rDNA	34	0.573	267.535	153.225
	Y IGS	0.421	149.375	62.849		0.527974				Y IGS	35	0.678	261.424	177.224		2.23867
	X IGS	0.738	161.218	119.038						X IGS	36	0.382	207.133	79.165
31	Y rDNA	0.651	228.808	149.006	1.28281				31	Y rDNA	37	1.42	275.107	390.646	1.7895
	X rDNA	0.471	246.742	116.156						X rDNA	38	0.983	222.172	218.299
	Y IGS	1.043	175.52	183.085		3.05973				Y IGS	39	1.372	244.15	334.967		4.45482
	X IGS	0.439	136.208	59.837						X IGS	40	0.476	158.027	75.192
32	Y rDNA	0.795	220.572	175.373	1.12429				32	Y rDNA	41	0.633	274.487	173.864	1.3087
	X rDNA	0.597	261.219	155.985						X rDNA	42	0.498	266.993	132.852
	Y IGS	0.752	223.978	168.422		2.89191				Y IGS	43	0.761	238.263	181.348		6.01586
	X IGS	0.311	187.423	58.239						X IGS	44	0.172	175.727	30.145
33	Y rDNA	0.936	172.892	161.745	1.01475				33	Y rDNA	45	1.733	319.609	553.894	1.6141
	X rDNA	0.762	209.203	159.394						X rDNA	46	1.301	263.712	343.16
	Y IGS	1.042	133.506	139.071		1.60967				Y IGS	47	2.668	200.953	536.152		4.6281
	X IGS	0.648	133.326	86.397						X IGS	48	1.062	109.079	115.847
34	Y rDNA	1.039	246.506	256.236	1.19447				34	Y rDNA	49	0.875	355.196	310.854	1.32532
	X rDNA	0.976	219.694	214.518						X rDNA	50	0.733	319.786	234.551
	Y IGS	0.934	231.346	216.174		2.21808				Y IGS	51	0.764	304.548	232.765		4.13804
	X IGS	0.599	162.609	97.46						X IGS	52	0.28	200.56	56.25
35	Y rDNA	0.775	229.862	178.222	1.26791				35	Y rDNA	53	0.626	343.439	214.977	1.31749
	X rDNA	0.688	204.24	140.564						X rDNA	54	0.486	335.522	163.172
	Y IGS	0.926	184.342	170.648		2.26105				Y IGS	55	0.759	259.897	197.354		3.23876
	X IGS	0.655	115.23	75.473						X IGS	56	0.374	163.008	60.935
36	Y rDNA	0.971	219.96	213.616	1.07777				36	Y rDNA	57	0.735	189.733	139.533	1.49295
	X rDNA	0.88	225.142	198.201						X rDNA	58	0.526	177.804	93.461
	Y IGS	0.832	235.454	195.875		2.37393				Y IGS	59	1.055	194.434	205.22		5.8636
	X IGS	0.477	172.942	82.511						X IGS	60	0.301	116.461	34.999
37	Y rDNA	1.051	183.003	192.351	0.975119				37	Y rDNA	61	0.5	326.72	163.489	1.38291
	X rDNA	0.951	207.516	197.259						X rDNA	62	0.369	319.969	118.221
	Y IGS	1.232	176.676	217.577		2.1679				Y IGS	63	0.502	284.32	142.714		2.97917
	X IGS	0.819	122.607	100.363						X IGS	64	0.221	216.799	47.904
38	Y rDNA	0.707	294.321	208.188	1.15165				38	Y rDNA	65	0.574	301.062	172.775	1.12542
	X rDNA	0.685	263.87	180.774						X rDNA	66	0.483	317.904	153.52
	Y IGS	0.77	282.388	217.39		3.17673				Y IGS	67	0.662	276.27	182.848		3.66157
	X IGS	0.385	177.785	68.432						X IGS	68	0.255	195.937	49.937
39	Y rDNA	0.87	206.615	179.82	0.865002				39	Y rDNA	69	0.625	296.239	185.089	1.40598
	X rDNA	0.844	246.282	207.884						X rDNA	70	0.601	218.935	131.644
	Y IGS	0.836	268.814	224.862		2.37927				Y IGS	71	0.861	219.816	189.202		2.31757
	X IGS	0.451	209.701	94.509						X IGS	72	0.67	121.79	81.638
40	Y rDNA	0.513	235.81	120.993	1.38076				40	Y rDNA	73	0.793	366.514	290.567	1.55387
	X rDNA	0.438	200.153	87.628						X rDNA	74	0.59	317.015	186.996
	Y IGS	0.549	235.294	129.258		2.27163				Y IGS	75	1.069	256.98	274.665		2.72137
	X IGS	0.343	165.894	56.901						X IGS	76	0.634	159.162	100.929
41	Y rDNA	1.42	209.027	296.905	1.03536				41	Y rDNA	77	0.53	340.908	180.654	1.373
	X rDNA	1.375	208.617	286.764						X rDNA	78	0.427	307.925	131.576
	Y IGS	1.886	241.462	455.457		2.27282				Y IGS	79	0.551	292.093	160.822		3.22424
	X IGS	1.161	172.638	200.393						X IGS	80	0.243	205.203	49.879
42	Y rDNA	0.737	178.072	131.275	1.19195				42	Y rDNA	81	0.503	246.499	123.981	1.20823
	X rDNA	0.664	165.83	110.135						X rDNA	82	0.456	225.027	102.614
	Y IGS	0.837	214.786	179.737		1.8659				Y IGS	83	0.749	194.595	145.717		3.18271
	X IGS	0.591	162.966	96.327						X IGS	84	0.395	115.963	45.784
43	Y rDNA	0.441	194.718	85.91	2.14341				43	Y rDNA	85	0.657	228.046	149.901	1.23867
	X rDNA	0.276	145.135	40.081						X rDNA	86	0.524	230.731	121.018
	Y IGS	0.547	217.421	118.891		3.41778				Y IGS	87	0.661	141.771	93.77		2.63236
	X IGS	0.231	150.552	34.786						X IGS	88	0.34	104.819	35.622
44	Y rDNA	0.416	265.247	110.379	1.03724				44	Y rDNA	89	0.658	208.131	136.975	0.828244
	X rDNA	0.402	264.704	106.416						X rDNA	90	0.723	228.599	165.38
	Y IGS	0.445	252.326	112.389		2.83124				Y IGS	91	0.984	158.355	155.775		2.41362
	X IGS	0.221	179.508	39.696						X IGS	92	0.539	119.633	64.54
45	Y rDNA	0.773	267.232	206.672	1.22492				45	Y rDNA	93	0.522	249.84	130.533	1.32511
	X rDNA	0.723	233.42	168.723						X rDNA	94	0.374	263.465	98.507
	Y IGS	0.715	304.375	217.704		2.70238				Y IGS	95	0.581	284.032	164.997		4.04841
	X IGS	0.387	208.333	80.56						X IGS	96	0.194	209.588	40.756
46	Y rDNA	0.55	251.632	138.367	1.28472				46	Y rDNA	97	0.539	285.45	153.904	1.55048
	X rDNA	0.468	229.914	107.702						X rDNA	98	0.395	251.111	99.262
	Y IGS	0.711	181.617	129.196		2.60765				Y IGS	99	0.695	282.415	196.291		3.45388
	X IGS	0.391	126.663	49.545						X IGS	100	0.333	170.669	56.832
47	Y rDNA	0.744	198.278	147.617	1.05828
	X rDNA	0.576	242.142	139.488
	Y IGS	0.703	228.752	160.802		2.59091
	X IGS	0.317	195.993	62.064
48	Y rDNA	0.611	255.028	155.789	1.21244
	X rDNA	0.466	275.725	128.492
	Y IGS	0.805	244.205	196.618		2.68854
	X IGS	0.431	169.599	73.132
49	Y rDNA	1.428	232.39	331.784	0.943147
	X rDNA	1.291	272.459	351.784
	Y IGS	1.926	137.129	264.09		2.31262
	X IGS	0.93	122.746	114.195
50	Y rDNA	1.11	267.854	297.318	1.19774
	X rDNA	1.022	242.803	248.233
	Y IGS	1.137	290.301	329.943		2.53346
	X IGS	0.661	196.96	130.234
51	Y rDNA	1.161	214.226	248.622	1.24034
	X rDNA	1.072	187.051	200.446
	Y IGS	0.983	243.966	239.736		2.90526
	X IGS	0.491	167.948	82.518
